# Supplementary material
Source: PubMed Central journal article supplement (PMC3516255)
Supplement: SD2.pdf [file SD2.pdf]

SUPPLEMENTAL TABLE 1

Prevalence of the Y976F and F1076L polymorphisms in the *Plasmodium vivax* multidrug resistance 1 gene in worldwide isolates\*

| Location (date)                           | No. samples | Wild type YF      | Single mutant YL  | Single mutant FF | Double mutant FL  | Genotyping method (reference)    |
|-------------------------------------------|-------------|-------------------|-------------------|------------------|-------------------|----------------------------------|
| <b>Americas</b>                           |             |                   |                   |                  |                   |                                  |
| <b>Brazil</b>                             |             |                   |                   |                  |                   |                                  |
| Acrelândia, Acre (2008–2011)              | 13          | 8                 | 5                 | 0                | 0                 | Ampifluor assay (this study)     |
| Plcido de Castro, Acre (2008–2010)        | 58          | 44                | 13                | 0                | 1                 | Ampifluor assay (this study, 14) |
| Granada, Acre (2004–2006)                 | 111         | 91                | 17                | 1                | 2                 | Ampifluor assay (14)             |
| Remansinho, Amazonas (2009–2011)          | 46          | 46                | 0                 | 0                | 0                 | Ampifluor assay (this study)     |
| Porto Velho, Rondônia (1995)              | 8           | 2                 | 5                 | 0                | 1                 | Ampifluor assay (14)             |
| Paragominas, Par (2004)                   | 28          | 0                 | 0                 | 24               | 4                 | Sequencing (26)                  |
| Total                                     | 264         | 191 (72.3)        | 40 (15.1)         | 25 (9.5)         | 8 (3.0)           |                                  |
| <b>French Guiana</b>                      |             |                   |                   |                  |                   |                                  |
| Unknown sites                             | 4           | 4 (100)           | 0                 | 0                | 0                 | Sequencing (13)                  |
| <b>Honduras</b>                           |             |                   |                   |                  |                   |                                  |
|                                           | 37          | 29 (78.4)         | 1 (2.7)           | 3 (8.1)          | 4 (10.8)          | Sequencing (24)                  |
| <b>Africa</b>                             |             |                   |                   |                  |                   |                                  |
| <b>Mauritania</b>                         |             |                   |                   |                  |                   |                                  |
| Nouakchott (2007–2009)                    | 103         | 2 (1.9)           | 73 (70.9)         | 0                | 28 (27.2)         | Sequencing (28)                  |
| <b>Madagascar</b>                         |             |                   |                   |                  |                   |                                  |
| South (2006)                              | 5           | 0                 | 0                 | 0                | 5                 | Sequencing (11)                  |
| West (2006)                               | 53          | 0                 | 1                 | 0                | 52                | Sequencing (11)                  |
| Central highlands (2006)                  | 22          | 0                 | 0                 | 0                | 22                | Sequencing (11)                  |
| Total                                     | 80          | 0                 | 1 (1.2)           | 0                | 79 (98.7)         |                                  |
| <b>Asia</b>                               |             |                   |                   |                  |                   |                                  |
| <b>Azerbaijan</b>                         |             |                   |                   |                  |                   |                                  |
| Central region                            | 4           | 0                 | 4 (100)           | 0                | 0                 | Sequencing (13)                  |
| <b>Turkey</b>                             |             |                   |                   |                  |                   |                                  |
| Southeastern region                       | 3           | 0                 | 3 (100)           | 0                | 0                 | Sequencing (13)                  |
| <b>Sri Lanka</b>                          |             |                   |                   |                  |                   |                                  |
| Trincomalee (2007)                        | 20          | 8 (40.0)          | 8 (40.0)          | 0                | 4 (20.0)          | Amplifluor assay (14)            |
| <b>Cambodia</b>                           |             |                   |                   |                  |                   |                                  |
| Pursat (2008)                             | 69          | 7 (10.1)          | 1 (1.4)           | 0                | 61 (88.4)         | Amplifluor assay (14)            |
| <b>Vietnam</b>                            |             |                   |                   |                  |                   |                                  |
| Bao Loc (1995)                            | 9           | 0                 | 0                 | 0                | 9 (100)           | Amplifluor assay (14)            |
| <b>Myanmar</b>                            |             |                   |                   |                  |                   |                                  |
| Yangon (1999)                             | 11          | 6                 | 3                 | 0                | 2                 | Sequencing (27)                  |
| Unknown sites                             | 5           | 2                 | 0                 | 0                | 3                 | Sequencing (25)                  |
| Total                                     | 16          | 8 (50.0)          | 3 (18.7)          | 0                | 5 (31.2)          |                                  |
| <b>Laos</b>                               |             |                   |                   |                  |                   |                                  |
| Unknown sites                             | 5           | 0                 | 5 (100)           | 0                | 0                 | Sequencing (25)                  |
| <b>Thailand</b>                           |             |                   |                   |                  |                   |                                  |
| Mae Sod, Tak                              | 9           | 4                 | 1                 | 0                | 4                 | Sequencing (13)                  |
| Mae Sod, Tak (2003–2006)                  | 7           | 0                 | 2                 | 0                | 5                 | Sequencing (8)                   |
| Mae Sod, Tak (2008)                       | 24          | 8                 | 11                | 0                | 5                 | Sequencing (27)                  |
| Unknown sites, Tak                        | 11          | 3                 | 7                 | 0                | 1                 | Sequencing (25)                  |
| Total                                     | 51          | 15 (29.4)         | 21 (41.2)         | 0                | 15 (29.4)         |                                  |
| <b>Indonesia</b>                          |             |                   |                   |                  |                   |                                  |
| Alor, East Nusa Tenggara                  | 3           | 1                 | 0                 | 0                | 2                 | Sequencing (13)                  |
| Timika, Papua (2003–2006)                 | 24          | 0                 | 1                 | 0                | 23                | Sequencing (8)                   |
| Total                                     | 27          | 1 (3.7)           | 1 (3.7)           | 0                | 25 (92.6)         |                                  |
| <b>South Korea</b>                        |             |                   |                   |                  |                   |                                  |
| Unknown sites (2007–2009)                 | 96          | 0                 | 96 (100)          | 0                | 0                 | Sequencing (27)                  |
| <b>Southeast Pacific region</b>           |             |                   |                   |                  |                   |                                  |
| <b>Papua New Guinea</b>                   |             |                   |                   |                  |                   |                                  |
| Simbu, East Sepik, and Madang (2004–2005) | 94          | 57                | 0                 | 37               | 0                 | Fluorescence resonance assay (9) |
| Unknown site (2008)                       | 1           | 0                 | 0                 | 0                | 1                 | Sequencing (27)                  |
| Total                                     | 95          | 57 (60.0)         | 0                 | 37 (38.9)        | 1 (1.0)           |                                  |
| <b>Grand total</b>                        | <b>883</b>  | <b>322 (36.5)</b> | <b>257 (29.1)</b> | <b>65 (7.4)</b>  | <b>239 (27.1)</b> |                                  |

\*Values are no. (%).

SUPPLEMENTAL Table 2  
Number of copies of the *Plasmodium vivax* multidrug resistance 1 gene in worldwide isolates\*

| Location (date)                                                        | No. samples | No. gene copies   |                 |                | Copy number estimation method (reference) |
|------------------------------------------------------------------------|-------------|-------------------|-----------------|----------------|-------------------------------------------|
|                                                                        |             | 1                 | 2               | 3              |                                           |
| <b>Americas</b>                                                        |             |                   |                 |                |                                           |
| <b>Brazil</b>                                                          |             |                   |                 |                |                                           |
| Acrelândia, Acre (2008–2010)                                           | 10          | 10                | 0               | 0              | Real-time PCR (this study)                |
| Plcido de Castro, Acre (2008–2010)                                     | 54          | 53                | 1               | 0              | Real-time PCR (this study)                |
| Granada (2004–2006)                                                    | 97          | 96                | 1               | 0              | Real-time PCR (this study)                |
| Remansinho (2008–2010)                                                 | 54          | 0                 | 0               | 0              | Real-time PCR (this study)                |
| Total                                                                  | 215         | 213 (99.1)        | 2 (0.9)         | 0              |                                           |
| <b>Honduras</b>                                                        |             |                   |                 |                |                                           |
| Tegucigalpa, Juticalpa, Puerto Lempira, Trujullo, La Cerba (2004–2009) | 63          | 62 (98.4)         | 1 (1.6)         | 0              | Real-time PCR (24)                        |
| <b>Africa</b>                                                          |             |                   |                 |                |                                           |
| <b>Mauritania</b>                                                      |             |                   |                 |                |                                           |
| Nouakchott (2007–2009)                                                 | 105         | 102 (97.1)        | 3 (2.9)         | 0              | TaqMan assay (28)                         |
| <b>Asia</b>                                                            |             |                   |                 |                |                                           |
| <b>Myanmar</b>                                                         |             |                   |                 |                |                                           |
| Yangon (1999)                                                          | 11          | 11                | 0               | 0              | TaqMan assay (27)                         |
| Unknown sites                                                          | 49          | 48                | 1               | 0              | TaqMan assay (25)                         |
| Total                                                                  | 60          | 59 (98.3)         | 1 (1.7)         | 0              |                                           |
| <b>Laos</b>                                                            |             |                   |                 |                |                                           |
| Unknown sites                                                          | 50          | 48 (96.0)         | 2 (4.0)         | 0              | TaqMan assay (25)                         |
| <b>Thailand</b>                                                        |             |                   |                 |                |                                           |
| Mae Sod, Tak (2008)                                                    | 27          | 25                | 2               | 0              | TaqMan assay (27)                         |
| Unknown sites in Tak                                                   | 66          | 60                | 6               | 0              | TaqMan assay (25)                         |
| Unknown sites outside Tak                                              | 50          | 50                | 0               | 0              | TaqMan assay (25)                         |
| Mae Sod, Tak (2003–2007)                                               | 71          | 56                | 13              | 2              | Real-time PCR (16)                        |
| Total                                                                  | 214         | 191 (89.4)        | 21 (9.8)        | 2 (0.9)        |                                           |
| <b>Indonesia</b>                                                       |             |                   |                 |                |                                           |
| Timika, Papua (2003–2007)                                              | 114         | 114 (100)         | 0               | 0              | Real-time PCR (16)                        |
| <b>South Korea</b>                                                     |             |                   |                 |                |                                           |
| Unknown sites                                                          | 96          | 96 (100)          | 0               | 0              | TaqMan assay (27)                         |
| <b>Grand total</b>                                                     | <b>917</b>  | <b>885 (96.5)</b> | <b>30 (3.3)</b> | <b>2 (0.2)</b> |                                           |

\* Values are no. (%). PCR = polymerase chain reaction.
